# Supplementary material for: A novel colorimetric immunoassay strategy using iron(iii) oxide magnetic nanoparticles as a label for signal generation and amplification
Source: Royal Society of Chemistry journal article supplement (doi:10.1039/c6tb02696f), 2017-01-01
Supplement: c6tb02696f1.pdf [file c6tb02696f1.pdf]

## Supplementary Information

### A novel colorimetric immunoassay strategy using iron(III) oxide magnetic nanoparticle as a label for signal generation and amplification

Zeying Zhang<sup>a, b, c</sup>, Jin Xie<sup>a, b, c</sup>, Jie Yu<sup>a, b, c</sup>, Zhisong Lu<sup>a, b, c</sup>, Yingshuai Liu<sup>a, b, c</sup>\*

a Institute for Clean Energy & Advanced Materials, Faculty of Materials & Energy, Southwest University, Chongqing 400715, China

b Chongqing Engineering Research Center for Rapid Diagnosis of Dread Disease, Southwest University, Chongqing 400715, China

c Chongqing Key Laboratory for Advanced Materials and Technologies of Clean Energies, Southwest University, Chongqing 400715, China†

#### 1. Optimization of the concentration of AA/BPT

The effect of AA and BPT concentration on the color development was investigated to obtain the optimal signal intensity. We assumed that the microwell bottom was fully covered by a monolayer of the magnetic nanoparticle (MNP). Thus the maximum amount of the nanoparticle in each microwell was determined to be about 1.085  $\mu\text{g}$  according to its average diameter (9.7 nm) and density (5.24  $\text{g cm}^{-3}$ ). A same amount of MNP at 1.085  $\mu\text{g}$  was injected into each microwell, followed by addition of AA/BPT at different concentrations for color development. As shown in Fig. S1, the absorbance of the BPT- $\text{Fe}^{2+}$  complex gradually raise along with the increase of AA and BPT concentration. The absorbance gets a plateau when AA is not less than 970 mM and BPT is not less than 7 mM (as shown in the green rectangle). This result indicates that  $\gamma\text{-Fe}_2\text{O}_3$  MNPs are completely dissolved and converted into soluble red BPT- $\text{Fe}^{2+}$  complex when AA and BPT concentration is higher than the cut-off value. Therefore, 970 mM AA and 7 mM BPT were utilized as the optimal concentration in the following experiments.

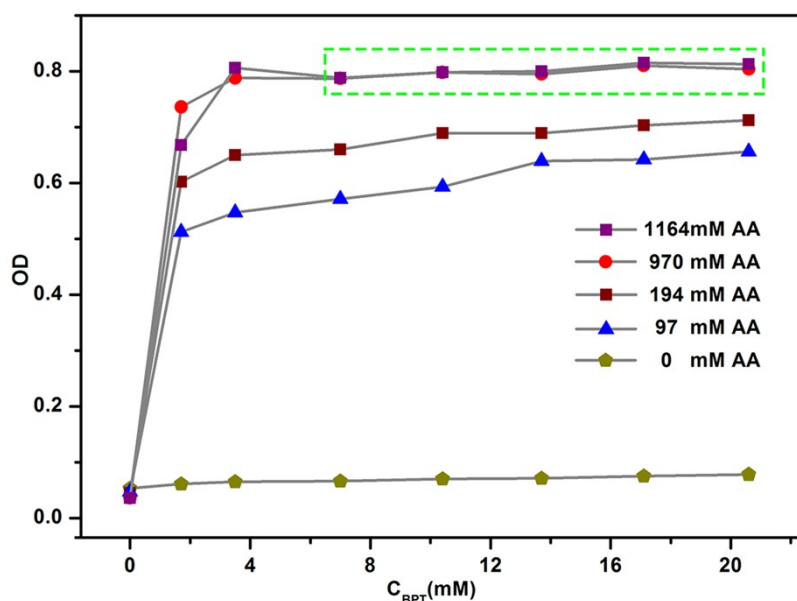

Fig. S1 UV-Vis absorbance as a function of AA and BPT concentration.

## 2. Optimization of the concentration of MNP-CA-Ab2

We studied the influence of MNP-CA-Ab2 concentration on signal to noise ratio in the sandwich immunoassay. As shown in Fig. S2, the absorbance at 535nm significantly increases when the concentration of MNP-CA-Ab2 is increased. The signal is very weak at four times dilution. Although the highest signal is observed from the original MNP-CA-Ab2 solution, the background signal is too high, resulting in a poor signal to noise ratio. The highest signal to noise ratio is observed from the group with twice dilution.

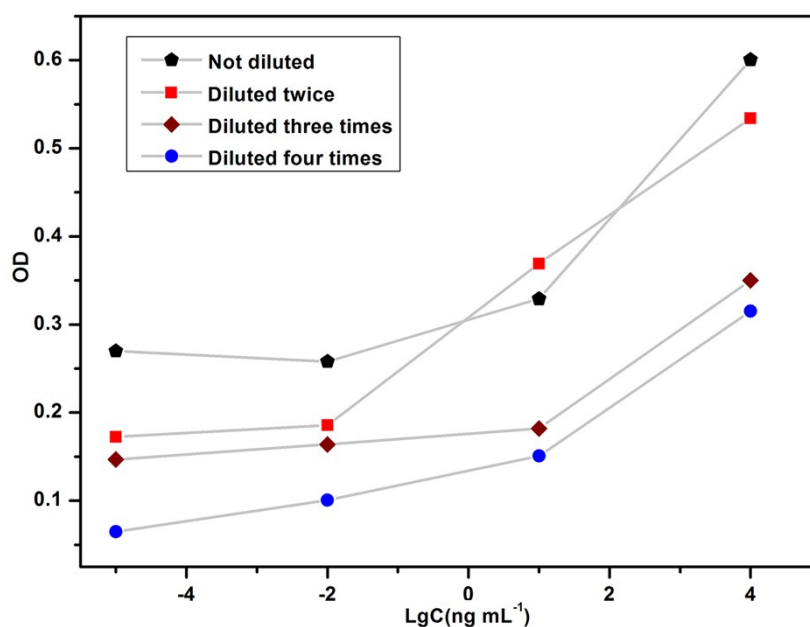

Fig. S2 Optimization of MNP-CA-Ab2 concentration. Four rabbit IgG concentrations

at 0, 10pg mL<sup>-1</sup>, 10ng mL<sup>-1</sup>, 10µg mL<sup>-1</sup> were tested in this experiment.

### 3. Selectivity of the colorimetric immunoassay

The selectivity was evaluated by performing CEA detection in PBS and 10% fetal bovine serum(FBS), in which there are many interferences including proteins, amino acids, nucleic acids, carbohydrates, and small molecules. Fig. S4 shows the results of CEA detection at 0 and 100ng mL<sup>-1</sup>. As for both 0 and 100ng mL<sup>-1</sup>, relative lower signal intensities are observed from 10% FBS in comparison with PBS group. It apparently results from that a high level of protein in 10% FBS passivates the surface of microplate, thus reducing the nonspecific adsorption of CEA during immunoassay. The lower background absorbance and the higher signal to noise ratio from 10% FBS group demonstrates the good selectivity of the developed colorimetric immunoassay.

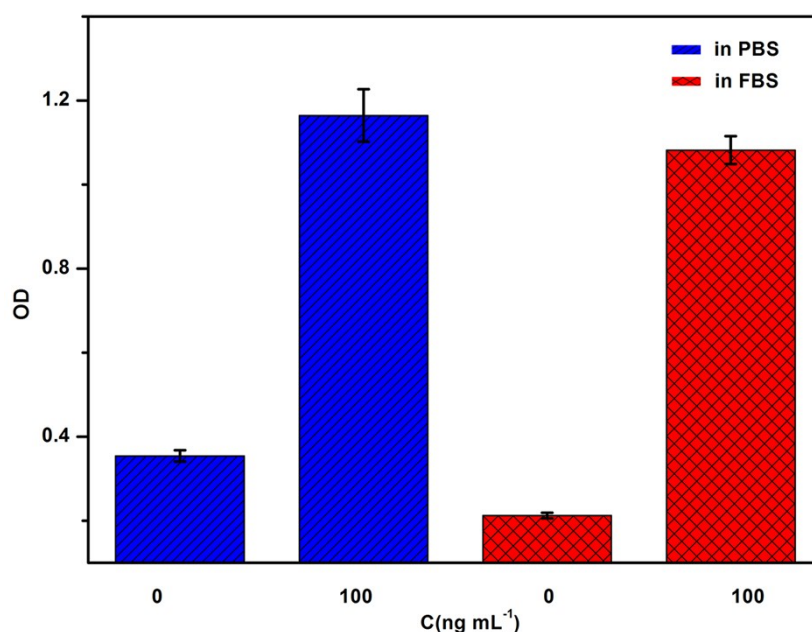

Fig. S3 UV-Vis absorbance from CEA detection in PBS and 10% FBS. CEA at concentrations of 0 and 100ng mL<sup>-1</sup> was tested in this experiment.
